# Supplementary material for: C-ERC/mesothelin provokes lymphatic invasion of colorectal adenocarcinoma
Source: Springer Nature journal article supplement (doi:10.1007/s00535-013-0773-6), 2013-03-19
Supplement: MOESM3 [file 8585488]

Supplemental Table 1**.** Summary of 19 patients with lymph node metastasis and luminal membrane expression of mesothelin

| **Case No.** | **Age** | **Sex** | **Histological classification** | **pT-factor** | **pN-factor** | **pStage** | **Lymphatic permeation** | **Blood vessel permeation** | **Curability** | **Site of reccurence** | **Outcome (month)** |
| --- | --- | --- | --- | --- | --- | --- | --- | --- | --- | --- | --- |
| 1 | 55 | F | mod | 3 | 1b | IIIB | positive (1) | positive (1) | B | lung, peritoneum | dead (100) |
| 2 | 71 | M | mod | 3 | 1b | IV | positive (1) | positive (1) | C | liver | dead (14) |
| 3 | 53 | F | por | 4a | 2a | IV | positive (3) | positive (3) | C | liver | dead (9) |
| 4 | 56 | M | well | 4a | 2b | IV | positive (2) | positive (2) | B | liver | dead (36) |
| 5 | 56 | F | mod | 4a | 1b | IIIB | positive (1) | positive (1) | A | - | alive (84) |
| 6 | 62 | M | well | 3 | 2a | IIIB | positive (1) | positive (2) | A | lung | dead (67) |
| 7 | 64 | F | mod | 3 | 1a | IIIB | positive (1) | positive (1) | A | - | alive (121) |
| 8 | 68 | M | mod | 4a | 2a | IIIC | positive (3) | positive (3) | B | - | dead (15) |
| 9 | 83 | F | mod | 3 | 1b | IIIB | positive (1) | positive (1) | A | - | dead (38) |
| 10 | 58 | F | well | 3 | 2b | IV | positive (2) | positive (2) | C | liver | dead (4) |
| 11 | 68 | F | well | 3 | 1a | IIIB | positive (1) | negative | A | - | alive (23) |
| 12 | 56 | F | mod | 4a | 2b | IIIC | positive (3) | positive (3) | C | liver, lung, local | dead (9) |
| 13 | 66 | F | mod | 4a | 2a | IIIC | positive (1) | positive (2) | A | liver, lung, bone | dead (11) |
| 14 | 75 | M | mod | 3 | 1b | IIIB | positive (2) | positive (1) | A | - | alive (76) |
| 15 | 71 | M | mod | 3 | 2a | IIIB | positive (3) | positive (2) | A | - | dead (70) |
| 16 | 67 | F | por | 2 | 1b | IIIA | positive (1) | negative | A | liver | dead (14) |
| 17 | 79 | M | mod | 3 | 2b | IIIC | positive (2) | positive (1) | B | lung | dead (6) |
| 18 | 79 | M | mod | 2 | 2a | IIIB | positive (2) | positive (1) | A | - | alive (55) |
| 19 | 81 | M | mod | 4a | 1b | IIIB | positive (1) | negative | A | - | dead (26) |

Lymphatic and blood vessel permeation: (1): mild, (2): moderate, (3) severe Case No.8, 15: unrelated death
